# Supplementary figures and images for: On the oxide ion conductivity of potassium doped strontium silicates
Source: Royal Society of Chemistry journal article supplement (doi:10.1039/c4ee00734d), 2014-07-09

### Supplementary Information

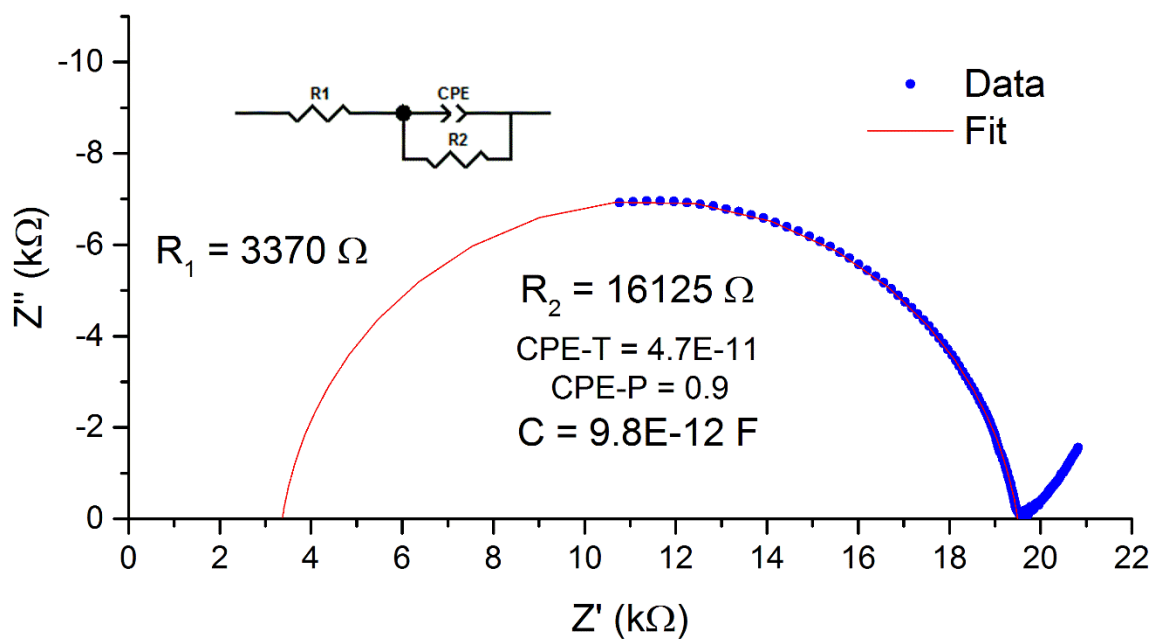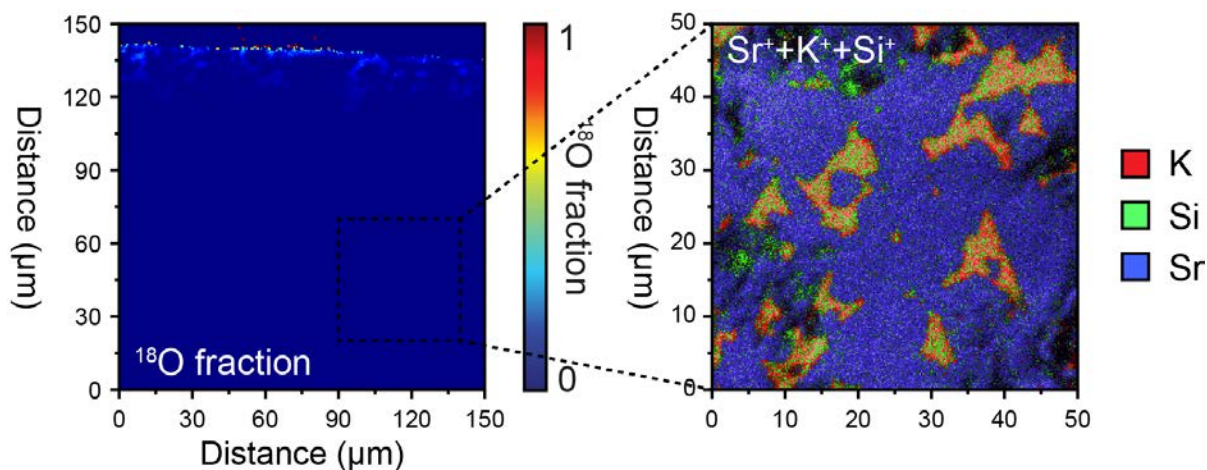

Supplement: c4ee00734d1.pdf [file c4ee00734d1.pdf]
